# Supplementary material
Source: MDPI journal article supplement (https://www.mdpi.com/2311-5637/9/4/367)
Supplement: s1 [file s1]

Archive with 3 entries (3 files):
- Table_S2_060223.xls
- Figure_S1.pdf
- Table S1_060223.xls
