# Supplementary material
Source: MDPI journal article supplement (https://www.mdpi.com/2311-5637/9/4/367)
Supplement: s1 [file s1 › Figure_S1.pdf]

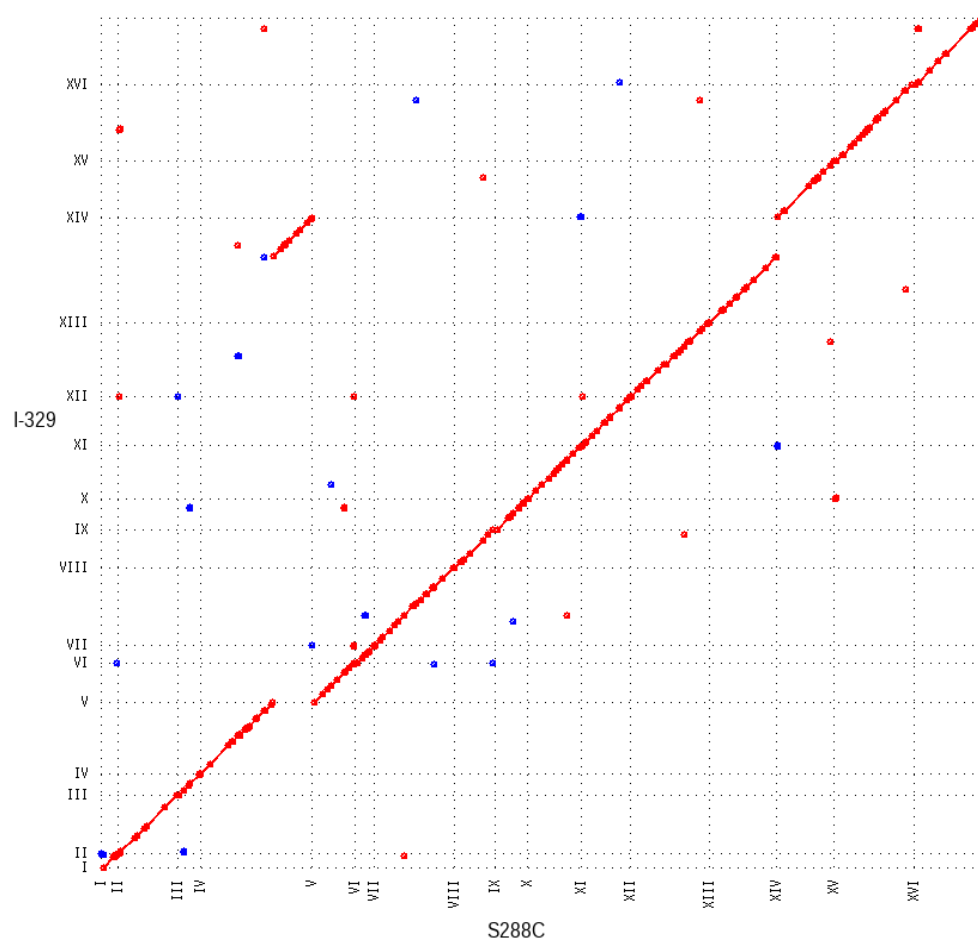

Figure S1. Location of homologous regions in the chromosomes of strain I-329 (vertical axis) and reference strain S288c (horizontal axis).
