# Supplementary material
Source: MDPI journal article supplement (https://www.mdpi.com/2311-5637/9/4/367)
Supplement: s1 [file s1 › Table S1_060223.xls]

## Sheet: Table S1
	Table S1. Diversity of yeasts in industrial velums revealed by 18S rRNA genes profiling
	Velum sample	M2	M6	M7	M9	Taxonomic assignment	OTU sequence
	Total 18S rRNA gene sequences	53353	62271	49050	60251
	Otu1	53093	62183	48886	60192	Saccharomyces cerevisiae	CCAGCAGCTGCGGTAATTCCAGCTCCAATAGCGTATATTAAAGTTGTTGCAGTTAAAAAGCTCGTAGTTGAACTTTGGGCCCGGTTGGCCGGTCCGATTTTTTCGTGTACTGGATTTCCAACGGGGCCTTTCCTTCTGGCTAACCTTGAGTCCTTGTGGCTCTTGGCGAACCAGGACTTTTACTTTGAAAAAATTAGAGTGTTCAAAGCAGGCGTATTGCTCGAATATATTAGCATGGAATAATAGAATAGGACGTTTGGTTCTATTTTGTTGGTTTCTAGGACCATCGTAATGATTAATAGGGACGGTCGGGGGCATCAGTATTCAATTGTCAGAGGTGAAATTCTTGGATTTATTGAAGACTAACTACTGCGAAAGCATTTGCCAAGGACGTTTTCA…
	Otu2	52	11	43	19	Pichia membranifaciens	CCAGCAGCTGCGGTAATTCCAGCTCCAATAGCGTATATTAAAGTTGTTGCAGTTAAAAAGCTCGTAGTTGAAGTTTGGGCCTGGGCGGGCGGTCTACCTATGGTGAGTACTGCTGCGGCCGGGTCTTTCCTTCTGGCTAGCCCTTGTGGCGAACCAGGACGATTACTTTGAGGAAATTAGAGTGTTCAAAGCAGGCCTTTGCTCGAATATATTAGCATGGAATAATAGAATAGGACGTATGGTTCTATTTTGTTGGTTTCTAGGACCATCGTAATGATTAATAGGGACGGTCGGGGGCATCAGTATTCAGTTGTCAGAGGTGAAATTCTTGGATTAACTGAAGACTAACTACTGCGAAAGCATTTGCCAAGGACGTTTTCATCAATCAAGAACGAAAGT
	Otu3	22	2	37	10	Malassezia restricta	CCAGCAGCTGCGGTAATTCCAGCTCCAATAGCGTATATTAAAGTTGTTGCAGTTAAAAAGCTCGTAGTTGGACCTTGGACCTGGACAGGCGGTCCGCCTCACGGCGAGTACTGTCTTGCTGGGTCTTTCCTCTTGGTGATCTGTTGTTTCGGCAGCAGGGAACCAGGACCTTTACTTTGAAAAAATTAGAGTGTTCAAAGCAGGCTCGACGCCGGAATATATTAGCATGGAATAATAAAATAGGACGTGCGGTTCTATTTTGTTGGTTTTTGGAATCGCCGTAATGATTAATAGGGACAGTCGGGGGCATTAGTACTCACATGCTAGAGGTGAAATTCTTGGATTTTGTGAAGACTAACTTCTGCGAAAGCATTTGCCAAGGATGTTTTCATCAATCAA…
