# Supplementary material
Source: MDPI journal article supplement (https://www.mdpi.com/2311-5637/9/4/367)
Supplement: s1 [file s1 › Table_S2_060223.xls]

## Sheet: Table S2
Table S2. SNPs distinguishing strain I-329 genome and metagenomes of velum samples
											Percent of alternative reads
Chromosome	Position	Reference	Alternative variant	Description	I329 total reads	I329 alterntive reads	M9 total reads	M9 alternative reads	M6 total reads	M6 alternative reads	I329	M9	M6	Gene
I	177961	ATTTTTTGA	ATTTTTTTGA	intergenic_region|MODIFIER|g76.t1-CHR_END|g76.t1-CHR_END|intergenic_region|g76.t1-CHR_END|||n.177967_177968insT||||||	119	0	179	152	163	65	0	84.9162	39.8773
I	178635	G	T	intergenic_region|MODIFIER|g76.t1-CHR_END|g76.t1-CHR_END|intergenic_region|g76.t1-CHR_END|||n.178635G>T||||||	287	0	225	190	206	85	0	84.4444	41.2621
I	178653	A	G	intergenic_region|MODIFIER|g76.t1-CHR_END|g76.t1-CHR_END|intergenic_region|g76.t1-CHR_END|||n.178653A>G||||||	289	0	226	188	206	87	0	83.1858	42.233
I	180745	G	T	intergenic_region|MODIFIER|g76.t1-CHR_END|g76.t1-CHR_END|intergenic_region|g76.t1-CHR_END|||n.180745G>T||||||	294	1	196	163	191	77	0.340136	83.1633	40.3141
III	24458	T	C	missense_variant|MODERATE|g88.t1|g88.t1|transcript|g88.t1|protein_coding|1/1|c.320A>G|p.Asn107Ser|320/966|320/966|107/321||	131	0	103	103	108	108	0	100	100	bifunctional AP-4-A phosphorylase/ADP sulfurylase
III	25173	C	A	intergenic_region|MODIFIER|g88.t1-g89.t1|g88.t1-g89.t1|intergenic_region|g88.t1-g89.t1|||n.25173C>A||||||	175	1	110	110	94	94	0.571429	100	100
III	25360	C	G	intergenic_region|MODIFIER|g88.t1-g89.t1|g88.t1-g89.t1|intergenic_region|g88.t1-g89.t1|||n.25360C>G||||||	125	0	96	96	99	99	0	100	100
III	25470	C	G	intergenic_region|MODIFIER|g88.t1-g89.t1|g88.t1-g89.t1|intergenic_region|g88.t1-g89.t1|||n.25470C>G||||||	96	0	123	123	83	83	0	100	100
III	25530	A	T	intergenic_region|MODIFIER|g88.t1-g89.t1|g88.t1-g89.t1|intergenic_region|g88.t1-g89.t1|||n.25530A>T||||||	56	0	122	122	84	83	0	100	98.8095
III	26415	T	C	missense_variant|MODERATE|g89.t1|g89.t1|transcript|g89.t1|protein_coding|1/1|c.286A>G|p.Asn96Asp|286/939|286/939|96/312||	133	0	89	89	93	93	0	100	100	uncharacterized protein YCL049C
III	27413	CGGCTAAAACAATTAAA	CA	intergenic_region|MODIFIER|g89.t1-g90.t1|g89.t1-g90.t1|intergenic_region|g89.t1-g90.t1|||n.27414_27428delGGCTAAAACAATTAA||||||	112	0	88	85	86	82	0	96.5909	95.3488
III	28644	G	A	missense_variant|MODERATE|g91.t1|g91.t1|transcript|g91.t1|protein_coding|1/1|c.503G>A|p.Gly168Glu|503/1392|503/1392|168/463||	119	0	94	94	88	88	0	100	100	Sps22p
III	38441	CGTATGTATGTATGTATG	CGTATGTATGTATGTATGTATG	intergenic_region|MODIFIER|g96.t1-g97.t1|g96.t1-g97.t1|intergenic_region|g96.t1-g97.t1|||n.38458_38459insTATG||||||	62	0	77	74	66	64	0	96.1039	96.9697
III	40668	A	G	missense_variant|MODERATE|g97.t1|g97.t1|transcript|g97.t1|protein_coding|1/1|c.2053A>G|p.Ile685Val|2053/2238|2053/2238|685/745||	145	0	79	79	96	96	0	100	100	glucose-induced degradation complex subunit GID7
III	42036	A	G	synonymous_variant|LOW|g98.t1|g98.t1|transcript|g98.t1|protein_coding|1/1|c.456T>C|p.Thr152Thr|456/1581|456/1581|152/526||	146	0	94	94	94	94	0	100	100	Atg22p
III	44385	A	C	missense_variant|MODERATE|g99.t1|g99.t1|transcript|g99.t1|protein_coding|1/1|c.352T>G|p.Ser118Ala|352/1401|352/1401|118/466||	158	1	81	81	85	85	0.632911	100	100	Sro9p
III	45194	T	C	synonymous_variant|LOW|g100.t1|g100.t1|transcript|g100.t1|protein_coding|1/1|c.192T>C|p.Gly64Gly|192/1686|192/1686|64/561||	166	0	49	48	82	82	0	97.9592	100	Gfd2p
III	45446	T	G	missense_variant|MODERATE|g100.t1|g100.t1|transcript|g100.t1|protein_coding|1/1|c.444T>G|p.His148Gln|444/1686|444/1686|148/561||	151	1	62	62	86	86	0.662252	100	100	Gfd2p
III	45815	T	C	synonymous_variant|LOW|g100.t1|g100.t1|transcript|g100.t1|protein_coding|1/1|c.813T>C|p.Ser271Ser|813/1686|813/1686|271/561||	141	0	77	77	100	100	0	100	100	Gfd2p
III	59350	C	G	intergenic_region|MODIFIER|g109.t1-g110.t1|g109.t1-g110.t1|intergenic_region|g109.t1-g110.t1|||n.59350C>G||||||	119	0	105	105	92	92	0	100	100
III	60423	T	C	intergenic_region|MODIFIER|g110.t1-g111.t1|g110.t1-g111.t1|intergenic_region|g110.t1-g111.t1|||n.60423T>C||||||	123	0	112	111	107	107	0	99.1071	100
III	62264	T	G	missense_variant|MODERATE|g112.t1|g112.t1|transcript|g112.t1|protein_coding|1/1|c.1618A>C|p.Ile540Leu|1618/1902|1618/1902|540/633||	142	0	82	82	93	93	0	100	100	amino acid transporter AGP1
III	62620	T	C	missense_variant|MODERATE|g112.t1|g112.t1|transcript|g112.t1|protein_coding|1/1|c.1262A>G|p.Asn421Ser|1262/1902|1262/1902|421/633||	148	0	74	74	104	103	0	100	99.0385	amino acid transporter AGP1
IV	24576	G	A	missense_variant|MODERATE|g216.t1|g216.t1|transcript|g216.t1|protein_coding|1/1|c.2188C>T|p.Arg730Cys|2188/2373|2188/2373|730/790||	227	0	101	71	95	88	0	70.297	92.6316	Ady3p
IV	837470	T	C	synonymous_variant|LOW|g608.t1|g608.t1|transcript|g608.t1|protein_coding|1/1|c.231T>C|p.Ile77Ile|231/2655|231/2655|77/884||	184	1	123	104	121	115	0.543478	84.5528	95.0413	Ebs1p
IV	926887	G	T	missense_variant|MODERATE|g646.t1|g646.t1|transcript|g646.t1|protein_coding|1/1|c.548C>A|p.Pro183Gln|548/582|548/582|183/193||	210	1	123	106	105	7	0.47619	86.1789	6.66667	gluconokinase
IX	357468	G	A	intergenic_region|MODIFIER|g4101.t1-g4102.t1|g4101.t1-g4102.t1|intergenic_region|g4101.t1-g4102.t1|||n.357468G>A||||||	178	0	94	94	99	99	0	100	100
IX	366632	C	A	missense_variant|MODERATE|g4103.t1|g4103.t1|transcript|g4103.t1|protein_coding|1/1|c.249C>A|p.Asp83Glu|249/1002|249/1002|83/333||	184	2	100	100	94	94	1.08696	100	100	Mrs1p
IX	366755	T	C	synonymous_variant|LOW|g4103.t1|g4103.t1|transcript|g4103.t1|protein_coding|1/1|c.372T>C|p.Asp124Asp|372/1002|372/1002|124/333||	198	0	95	95	95	95	0	100	100	Mrs1p
IX	369031	A	G	synonymous_variant|LOW|g4105.t1|g4105.t1|transcript|g4105.t1|protein_coding|1/1|c.255A>G|p.Gln85Gln|255/2898|255/2898|85/965||	198	0	68	68	112	112	0	100	100	Dal81p
VII	23103	T	G	missense_variant|MODERATE|g3213.t1|g3213.t1|transcript|g3213.t1|protein_coding|1/1|c.808T>G|p.Tyr270Asp|808/900|808/900|270/299||	223	0	105	105	100	99	0	100	99	Fzf1p
VII	85151	C	A	intergenic_region|MODIFIER|g3246.t1-g3247.t1|g3246.t1-g3247.t1|intergenic_region|g3246.t1-g3247.t1|||n.85151C>A||||||	201	1	99	99	108	108	0.497512	100	100
VII	120441	A	G	synonymous_variant|LOW|g3260.t1|g3260.t1|transcript|g3260.t1|protein_coding|1/1|c.603T>C|p.Asp201Asp|603/3045|603/3045|201/1014||	226	0	110	110	116	116	0	100	100	MCM DNA helicase complex subunit MCM6
VII	703473	G	A	missense_variant|MODERATE|g3532.t1|g3532.t1|transcript|g3532.t1|protein_coding|1/1|c.3541G>A|p.Glu1181Lys|3541/4356|3541/4356|1181/1451||	221	0	111	111	105	105	0	100	100	chromatin-remodeling histone chaperone SPT6
VII	873409	A	C	missense_variant|MODERATE|g3611.t1|g3611.t1|transcript|g3611.t1|protein_coding|1/1|c.436A>C|p.Met146Leu|436/447|436/447|146/148||	226	0	88	88	81	81	0	100	100	phosphatase YCH1
VII	892423	A	G	intergenic_region|MODIFIER|g3624.t1-g3625.t1|g3624.t1-g3625.t1|intergenic_region|g3624.t1-g3625.t1|||n.892423A>G||||||	207	0	88	88	117	117	0	100	100
VIII	440255	G	A	missense_variant|MODERATE|g3902.t1|g3902.t1|transcript|g3902.t1|protein_coding|1/1|c.775G>A|p.Asp259Asn|775/1299|775/1299|259/432||	215	1	93	93	106	106	0.465116	100	100	N,N-dimethylaniline monooxygenase
XII	308351	A	G	intergenic_region|MODIFIER|g1099.t1-g1100.t1|g1099.t1-g1100.t1|intergenic_region|g1099.t1-g1100.t1|||n.308351A>G||||||	207	0	75	68	102	20	0	90.6667	19.6078
XII	502920	T	G	missense_variant|MODERATE|g1194.t1|g1194.t1|transcript|g1194.t1|protein_coding|1/1|c.217T>G|p.Phe73Val|217/1383|217/1383|73/460||	218	0	106	72	117	106	0	67.9245	90.5983	B-type cyclin CLB4
XII	729773	G	A	intergenic_region|MODIFIER|g1296.t1-g1297.t1|g1296.t1-g1297.t1|intergenic_region|g1296.t1-g1297.t1|||n.729773G>A||||||	142	1	122	15	126	111	0.704225	12.2951	88.0952
XII	847052	T	C	missense_variant|MODERATE|g1352.t1|g1352.t1|transcript|g1352.t1|protein_coding|1/1|c.1153A>G|p.Thr385Ala|1153/2076|1153/2076|385/691||	218	0	123	121	119	25	0	98.374	21.0084	tethering complex ATP-binding subunit VPS33
XII	861117	A	G	intergenic_region|MODIFIER|g1356.t1-g1357.t1|g1356.t1-g1357.t1|intergenic_region|g1356.t1-g1357.t1|||n.861117A>G||||||	183	0	100	100	78	69	0	100	88.4615
XII	862712	A	G	missense_variant|MODERATE|g1357.t1|g1357.t1|transcript|g1357.t1|protein_coding|1/1|c.1252A>G|p.Ser418Gly|1252/2040|1252/2040|418/679||	207	0	95	95	126	124	0	100	98.4127	zinc-coordinating transcription factor SFP1
XII	965880	T	G	missense_variant|MODERATE|g1401.t1|g1401.t1|transcript|g1401.t1|protein_coding|1/1|c.154A>C|p.Lys52Gln|154/2097|154/2097|52/698||	164	0	109	39	125	121	0	35.7798	96.8	GTPase-activating protein SST2
XIII	856088	G	T	synonymous_variant|LOW|g1815.t1|g1815.t1|transcript|g1815.t1|protein_coding|1/1|c.771G>T|p.Pro257Pro|771/1680|771/1680|257/559||	211	0	104	93	95	84	0	89.4231	88.4211	1,3-beta-glucanosyltransferase GAS1
XIII	857670	T	C	missense_variant|MODERATE|g1816.t1|g1816.t1|transcript|g1816.t1|protein_coding|1/1|c.2867A>G|p.Lys956Arg|2867/3270|2867/3270|956/1089||	228	0	90	74	105	87	0	82.2222	82.8571	Pse1p
XIII	932086	A	G	intergenic_region|MODIFIER|g1846.t1-g1847.t1|g1846.t1-g1847.t1|intergenic_region|g1846.t1-g1847.t1|||n.932086A>G||||||	191	1	103	87	122	9	0.52356	84.466	7.37705
XIII	1118418	GAAAAAGAT	GAAAAAAGAT	intergenic_region|MODIFIER|g1932.t1-g1933.t1|g1932.t1-g1933.t1|intergenic_region|g1932.t1-g1933.t1|||n.1118423_1118424insA||||||	201	0	114	100	87	5	0	87.7193	5.74713
XIII	1141395	G	A	synonymous_variant|LOW|g1944.t1|g1944.t1|transcript|g1944.t1|protein_coding|1/1|c.150C>T|p.Ile50Ile|150/1911|150/1911|50/636||	210	0	98	87	102	0	0	88.7755	0	E1 ubiquitin-activating protein UBA2
XIII	1355801	T	C	synonymous_variant|LOW|g2051.t1|g2051.t1|transcript|g2051.t1|protein_coding|1/1|c.1233A>G|p.Thr411Thr|1233/1452|1233/1452|411/483||	190	0	80	80	92	92	0	100	100	uncharacterized protein YDR514C
XIV	69096	G	T	missense_variant|MODERATE|g4491.t1|g4491.t1|transcript|g4491.t1|protein_coding|1/1|c.1327G>T|p.Gly443Trp|1327/1476|1327/1476|443/491||	192	0	99	99	106	106	0	100	100	Mrx6p
XIV	86967	A	T	intergenic_region|MODIFIER|g4500.t1-g4501.t1|g4500.t1-g4501.t1|intergenic_region|g4500.t1-g4501.t1|||n.86967A>T||||||	214	1	110	110	90	90	0.46729	100	100
XIV	106777	A	C	missense_variant|MODERATE|g4510.t1|g4510.t1|transcript|g4510.t1|protein_coding|1/1|c.609T>G|p.Asp203Glu|609/1053|609/1053|203/350||	215	0	97	97	90	90	0	100	100	glyoxylate reductase GOR1
XIV	510761	G	A	intergenic_region|MODIFIER|g4697.t1-g4698.t1|g4697.t1-g4698.t1|intergenic_region|g4697.t1-g4698.t1|||n.510761G>A||||||	197	0	82	82	88	88	0	100	100
